# Supplementary material for: Genetic Analysis of Potato Breeding Collection Using Single-Nucleotide Polymorphism (SNP) Markers
Source: MDPI journal article supplement (doi:10.3390/plants12091895), 2023-05-06

**Table S1.** Sanger sequence result of the StSNP138.

| Sample | Dosage score | Genotype | Sanger sequence result                                                               |
|--------|--------------|----------|--------------------------------------------------------------------------------------|
| A7     | 1            | CCCT     | 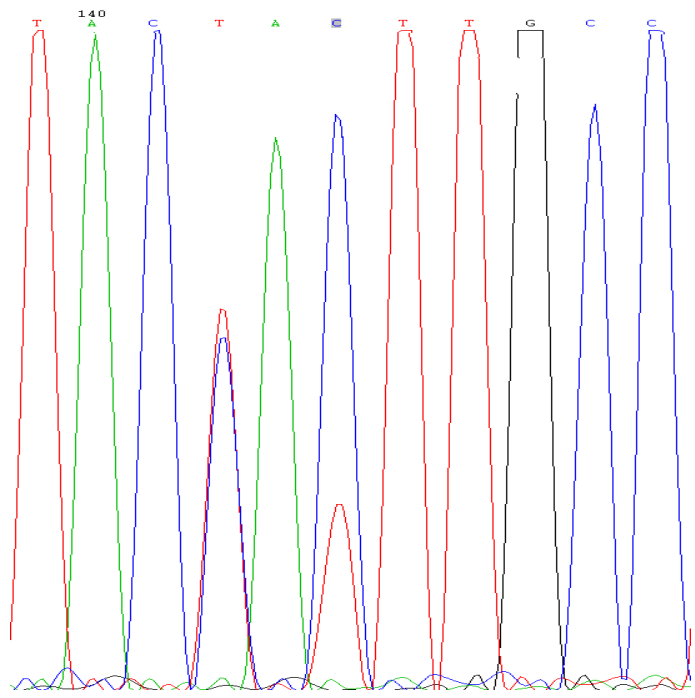  |
| A22    | 2            | CCTT     |  |

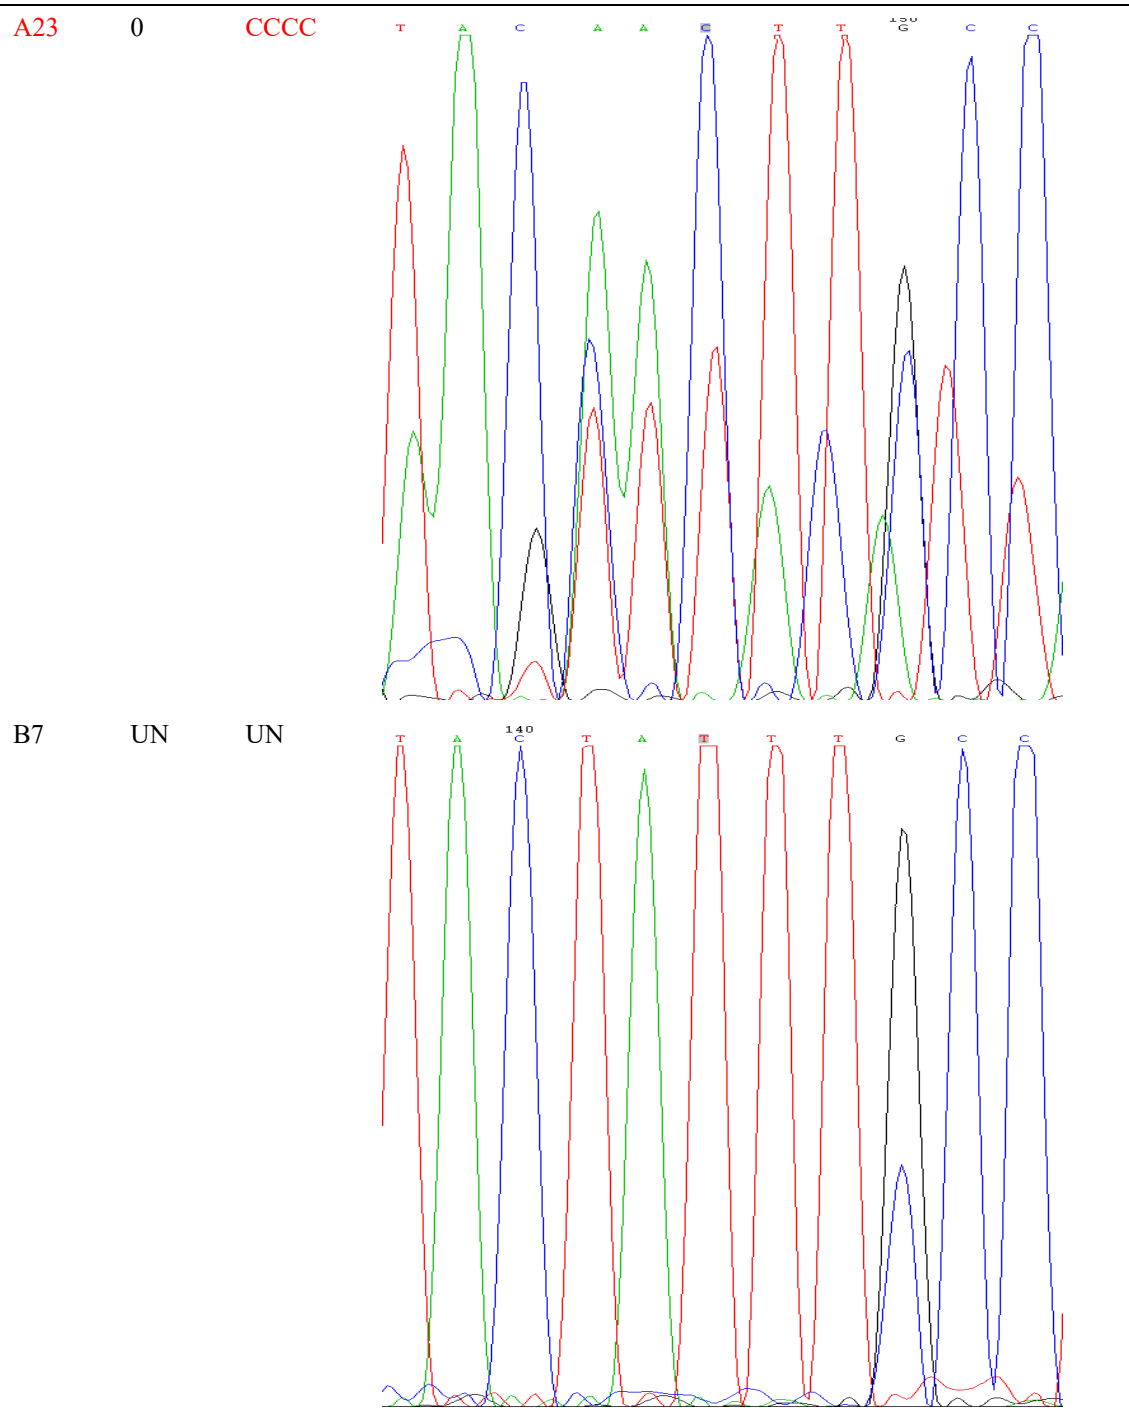

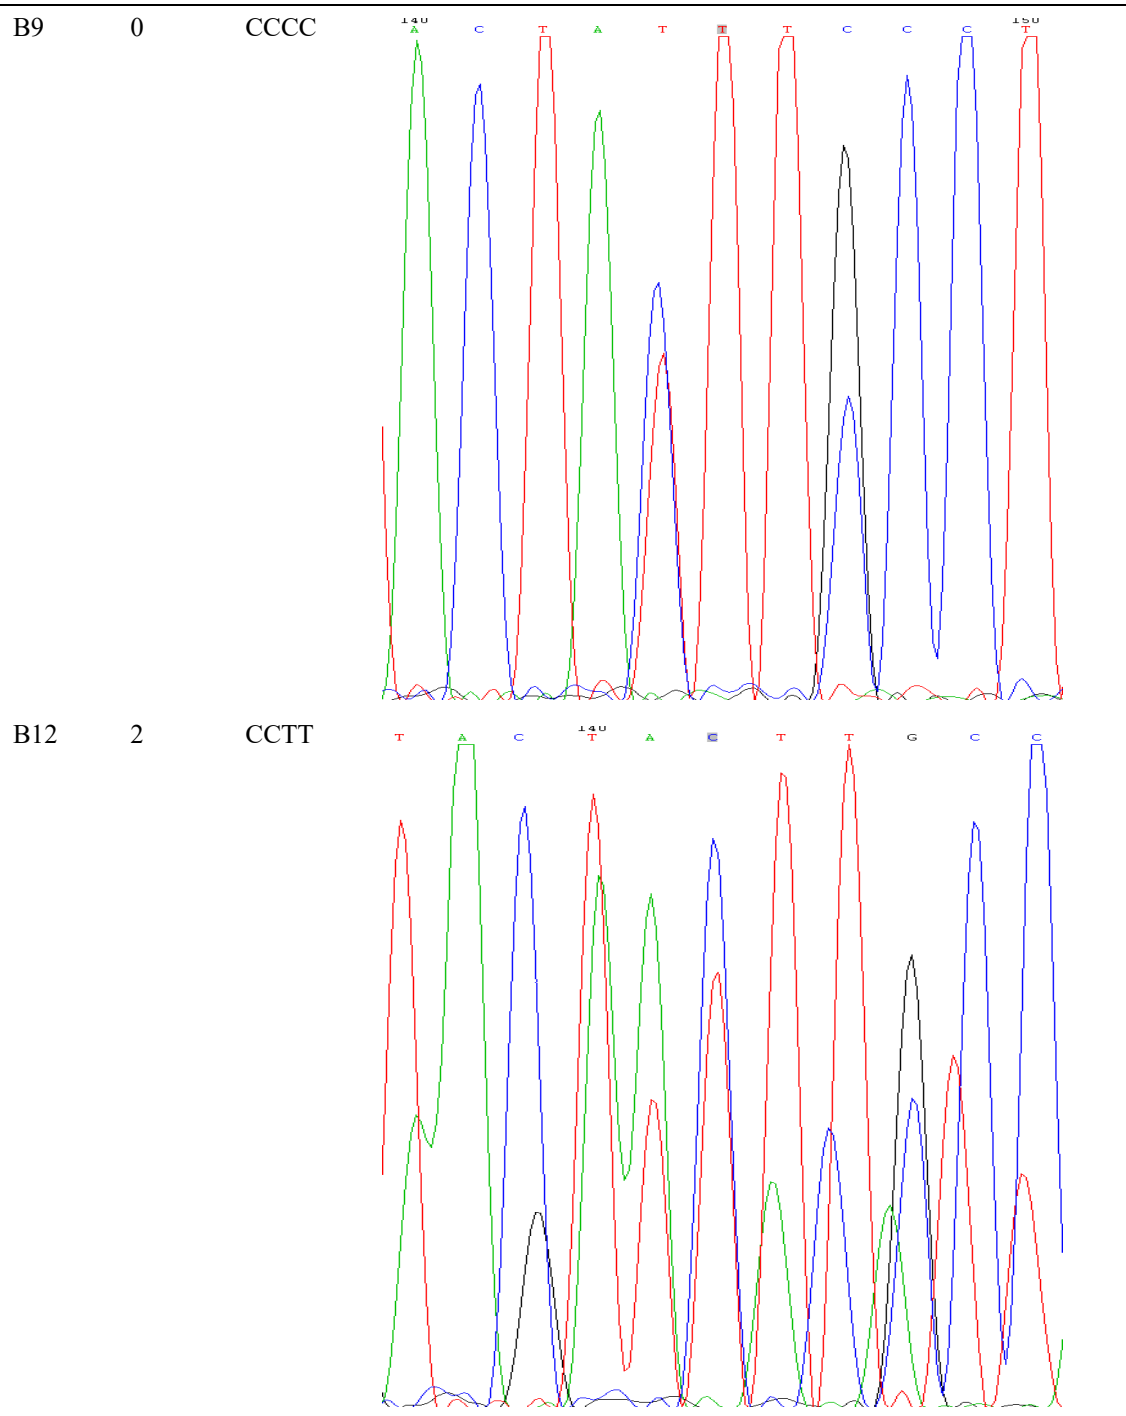

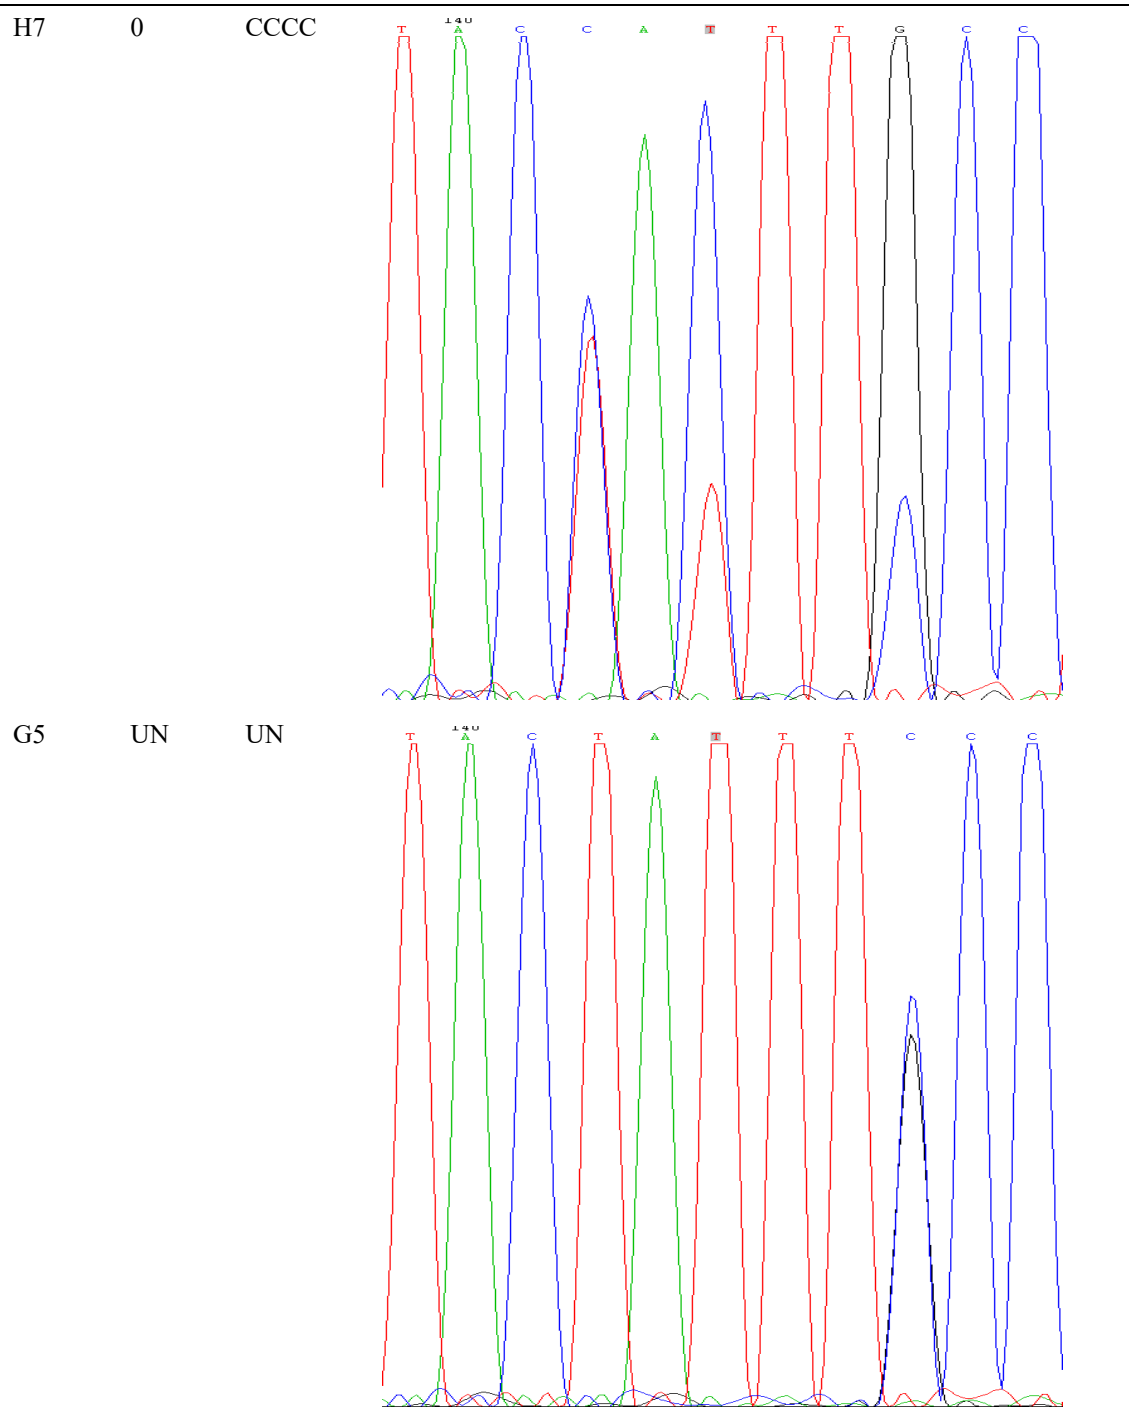

---

H3

2

CCTT

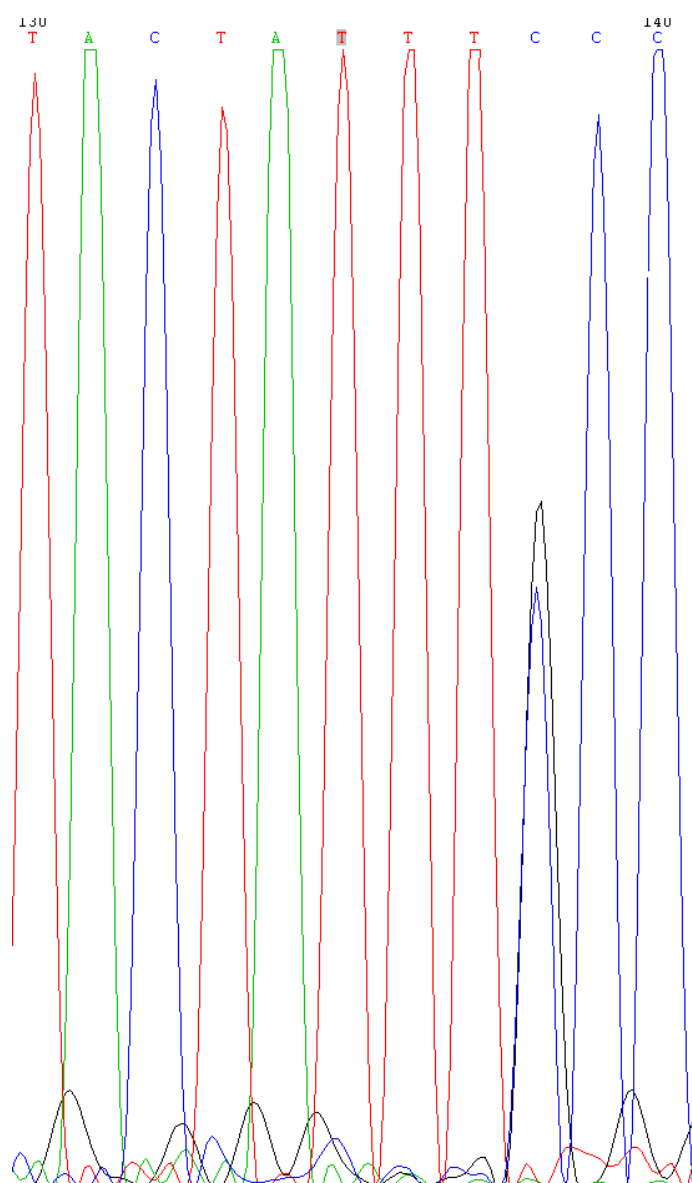

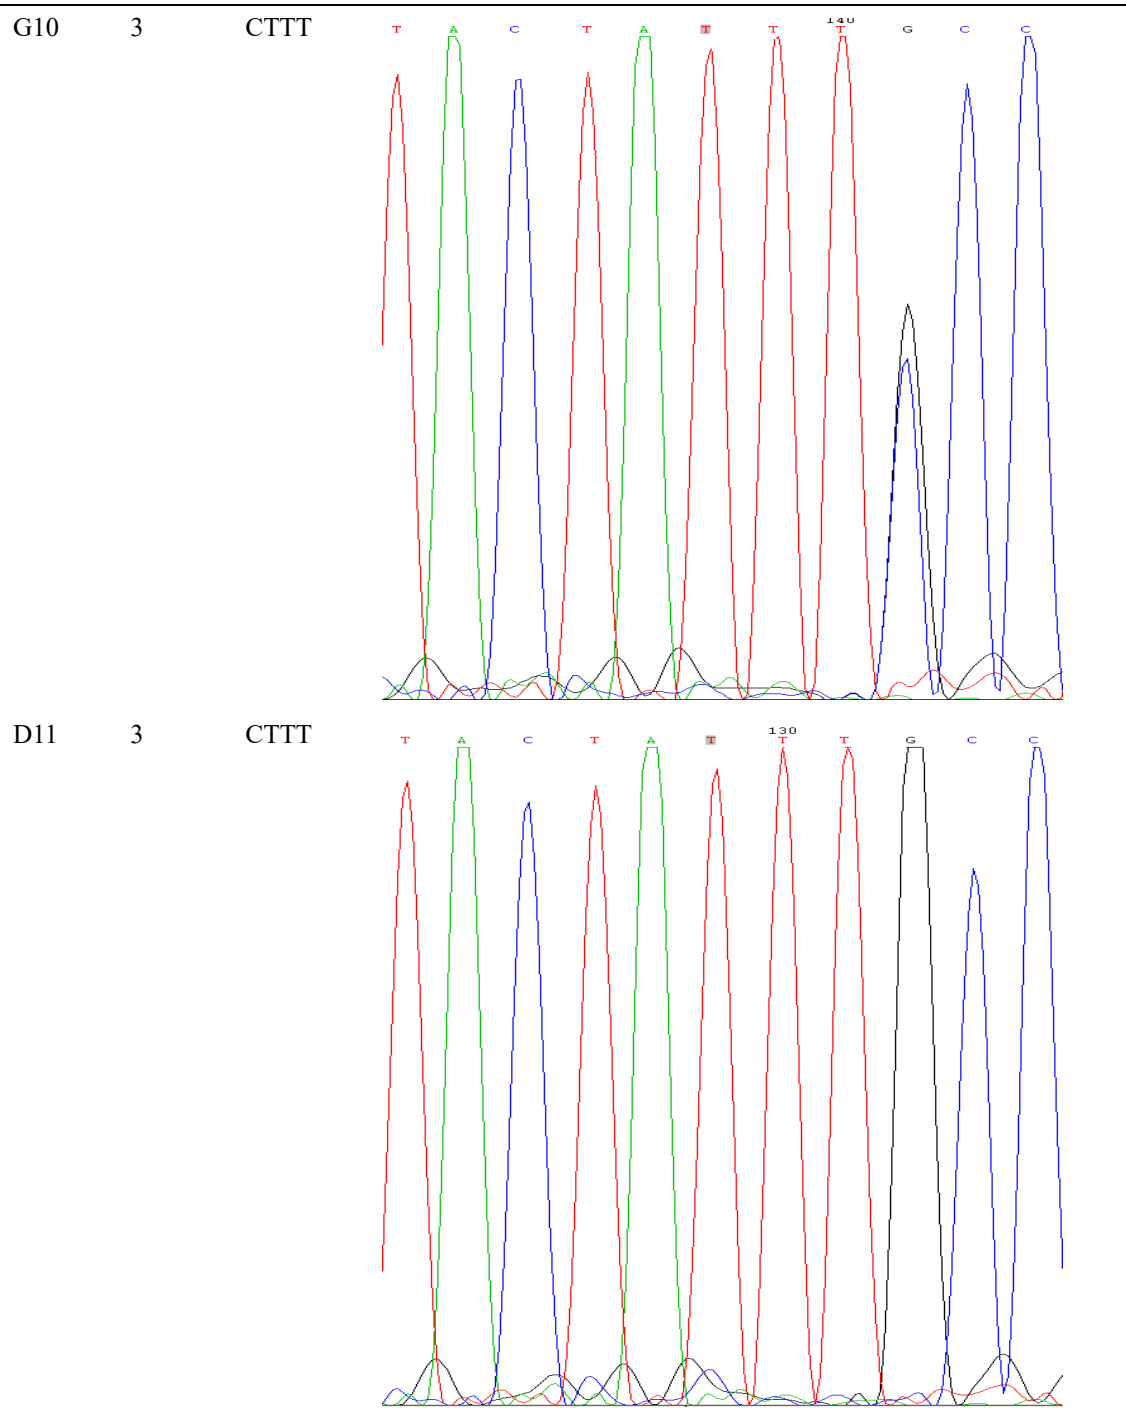

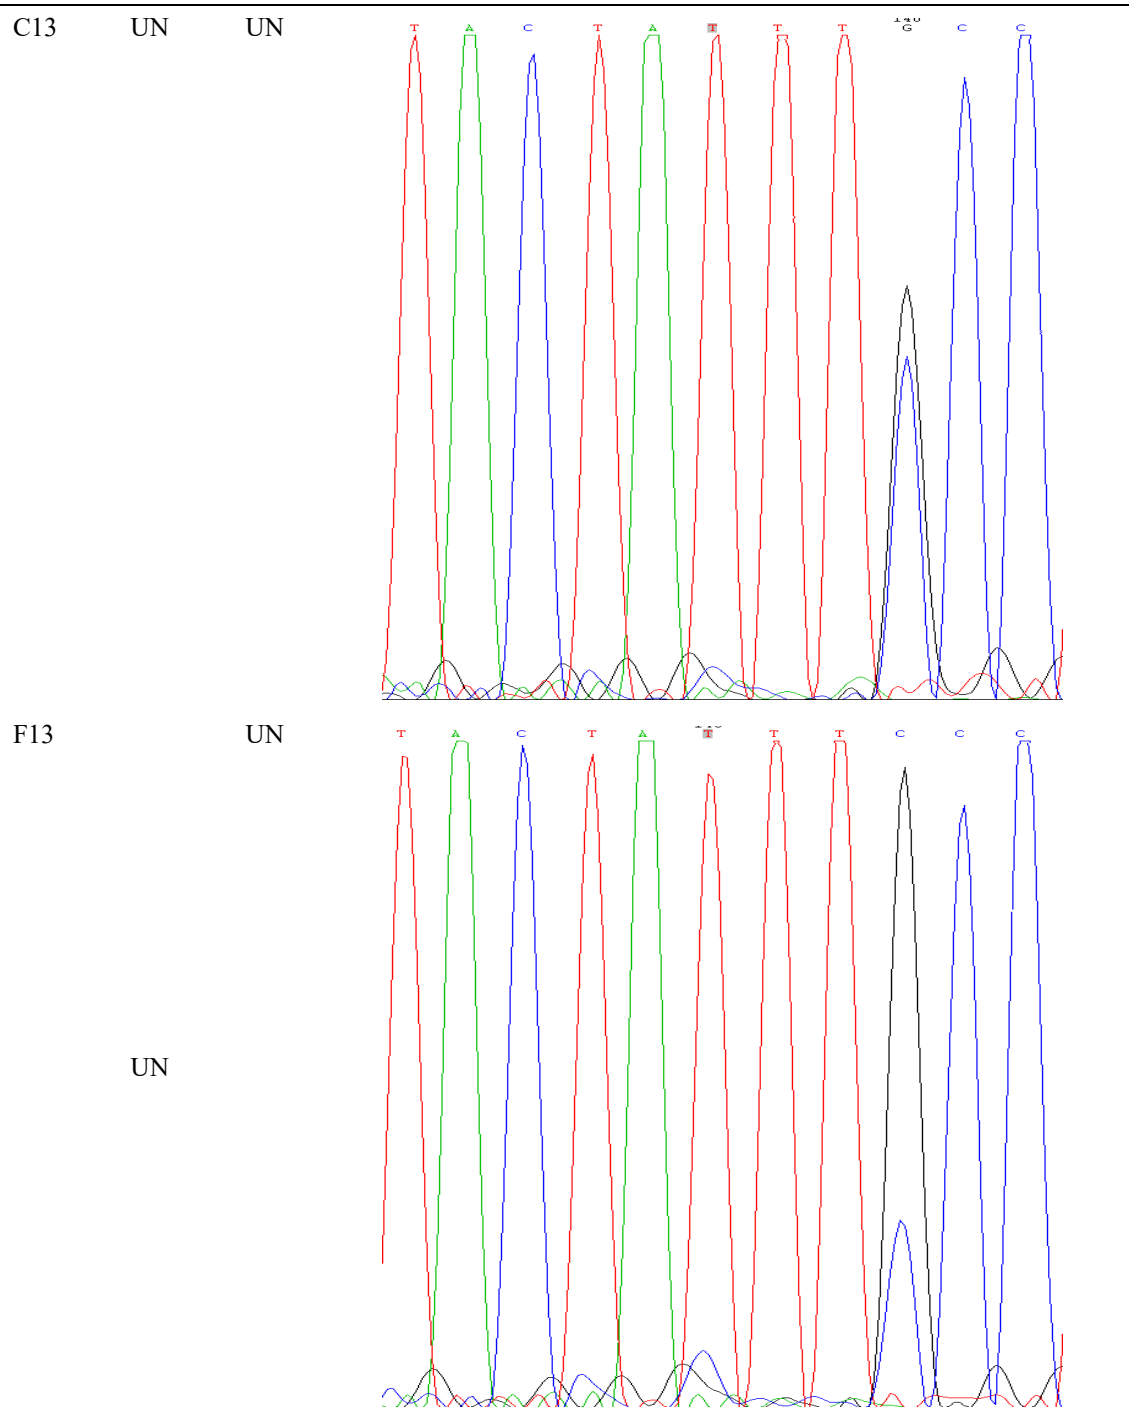

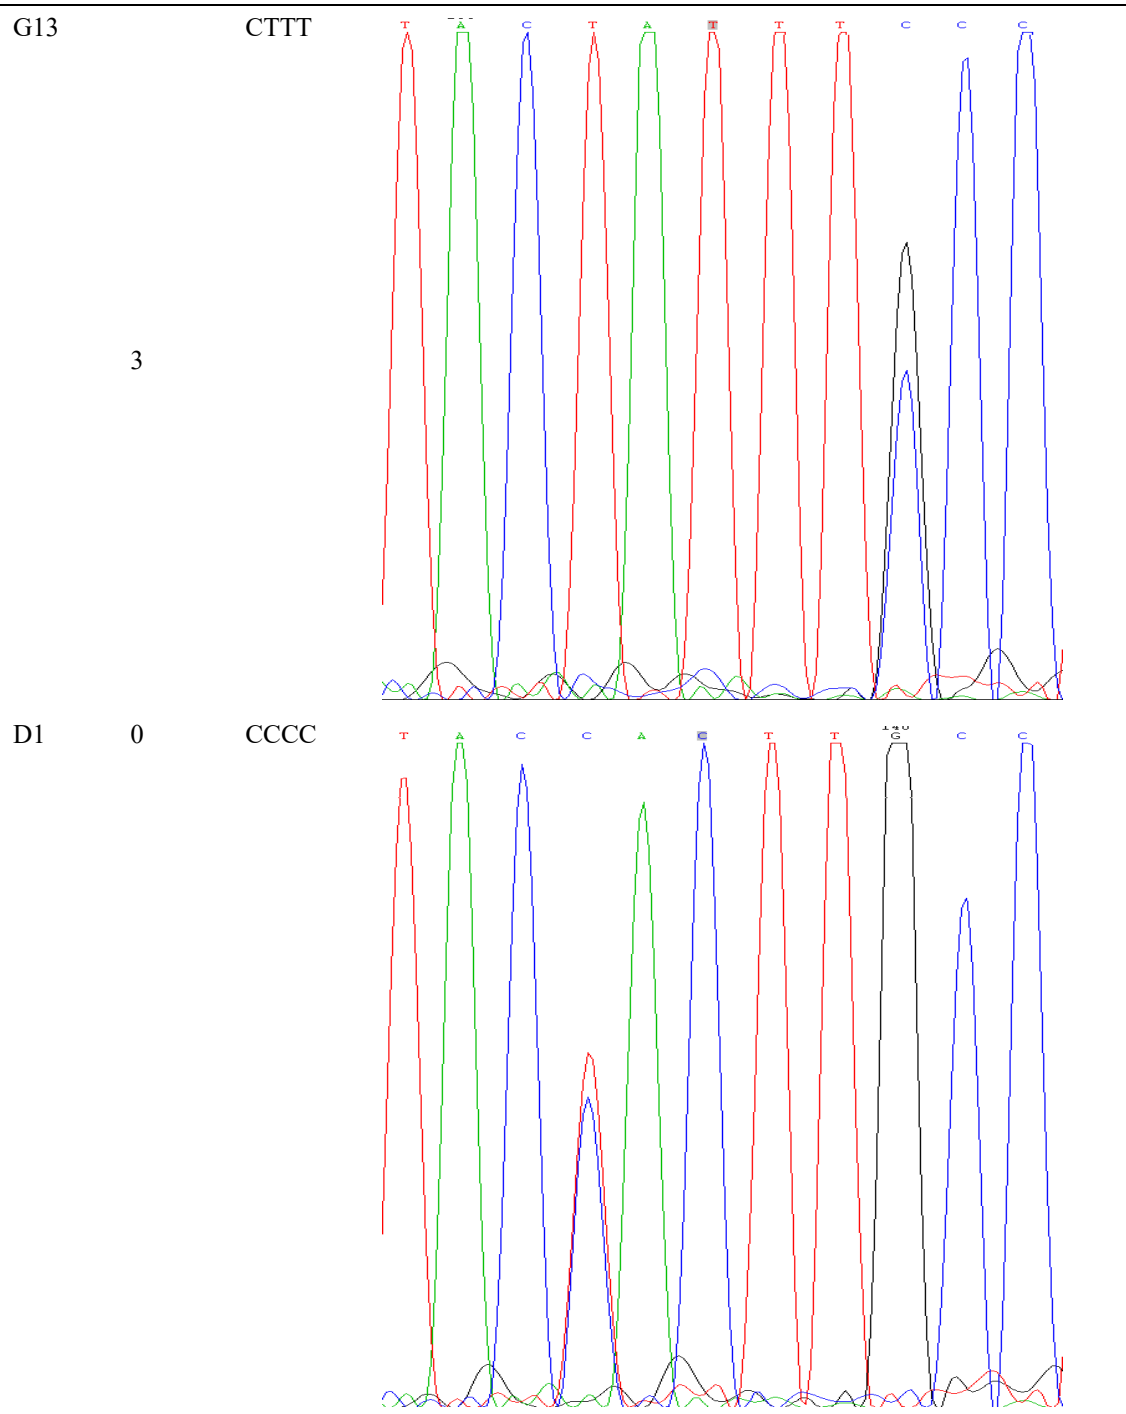



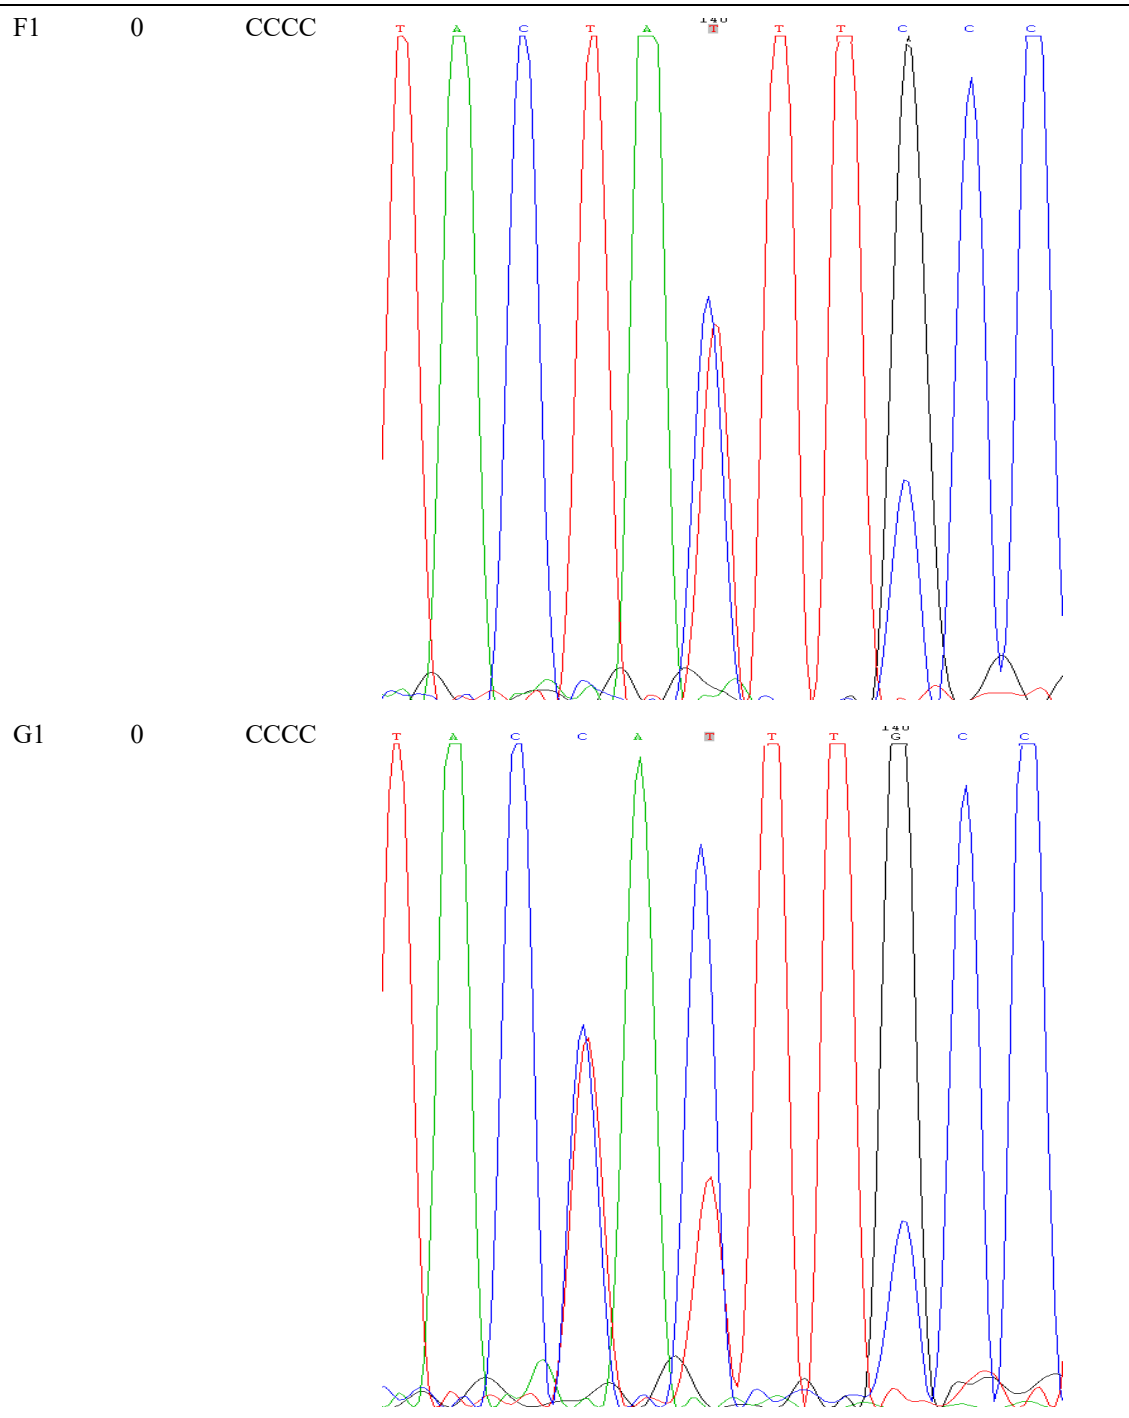

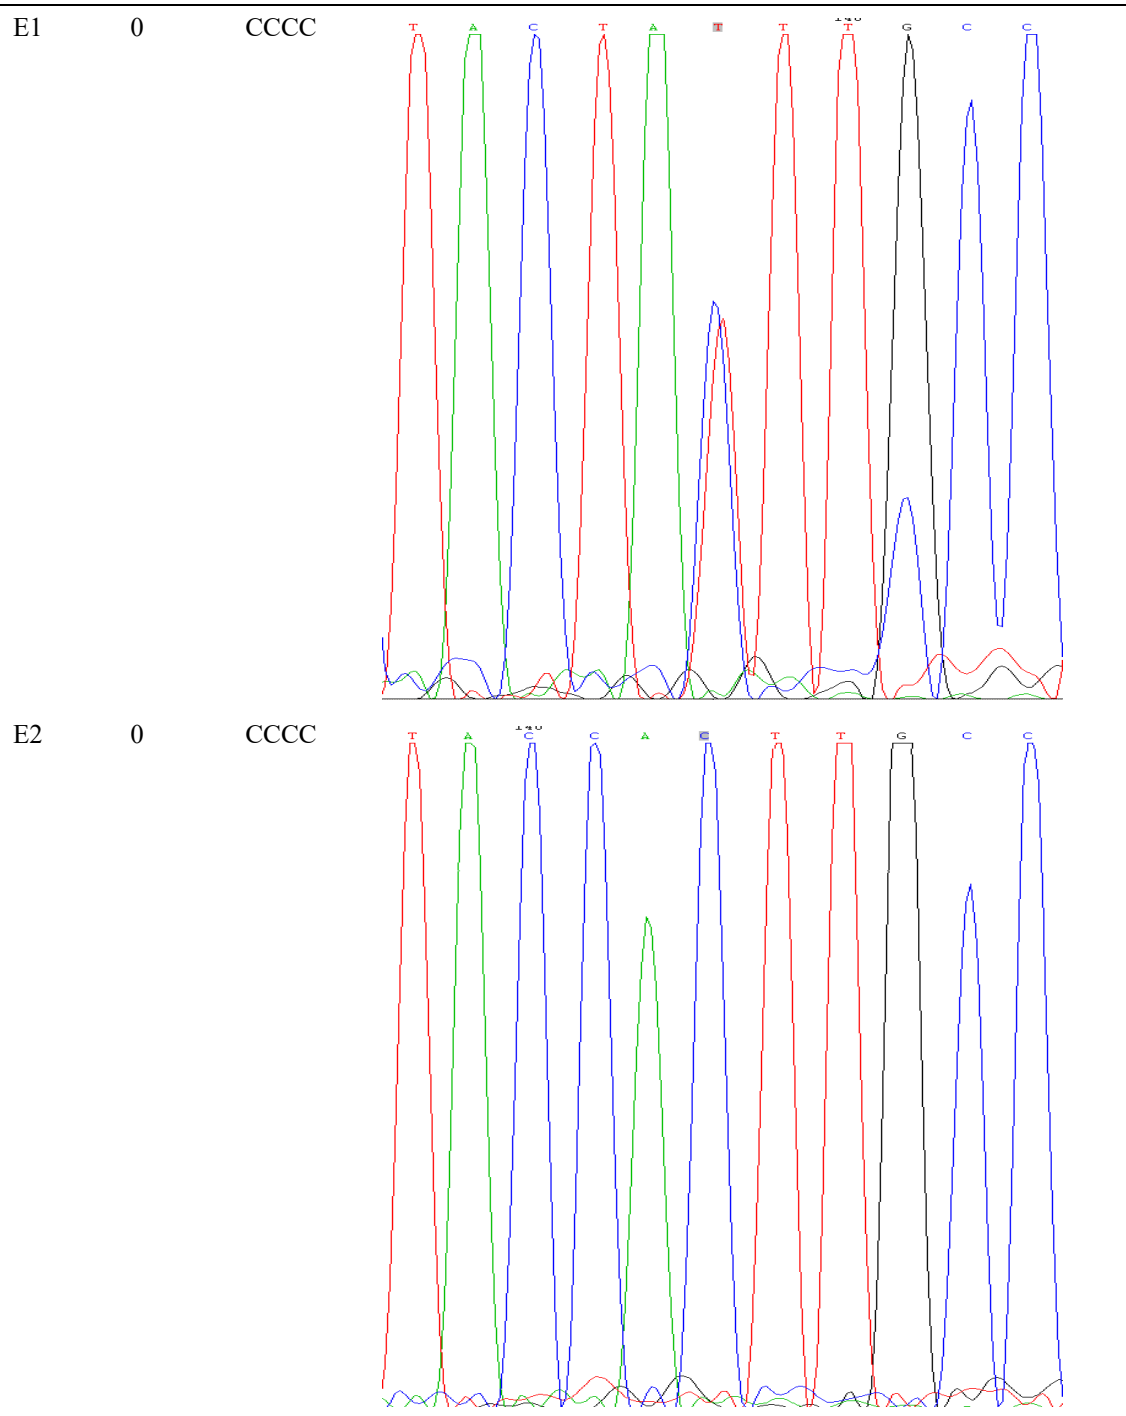

---

E3

1

CCCT

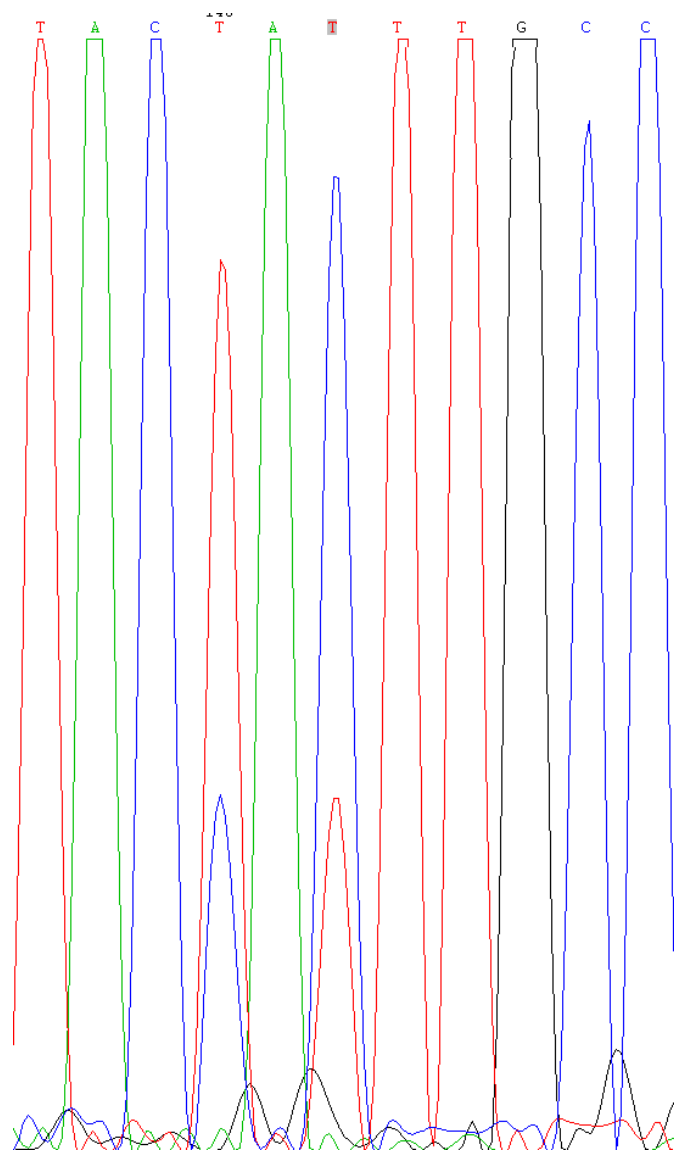

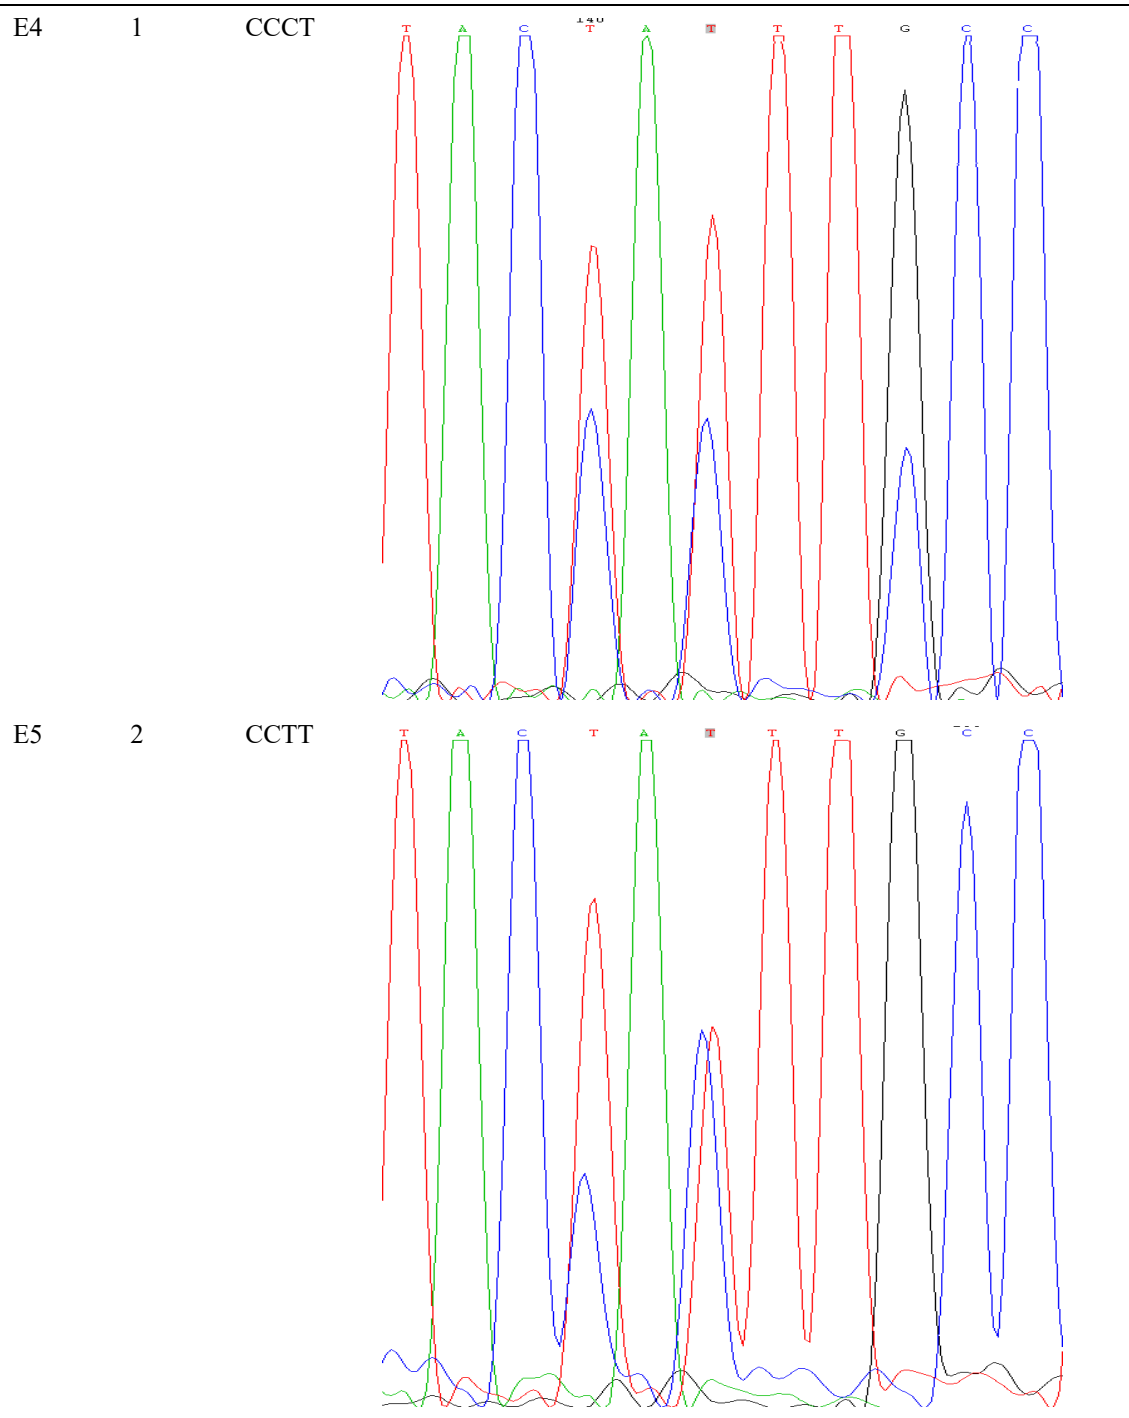

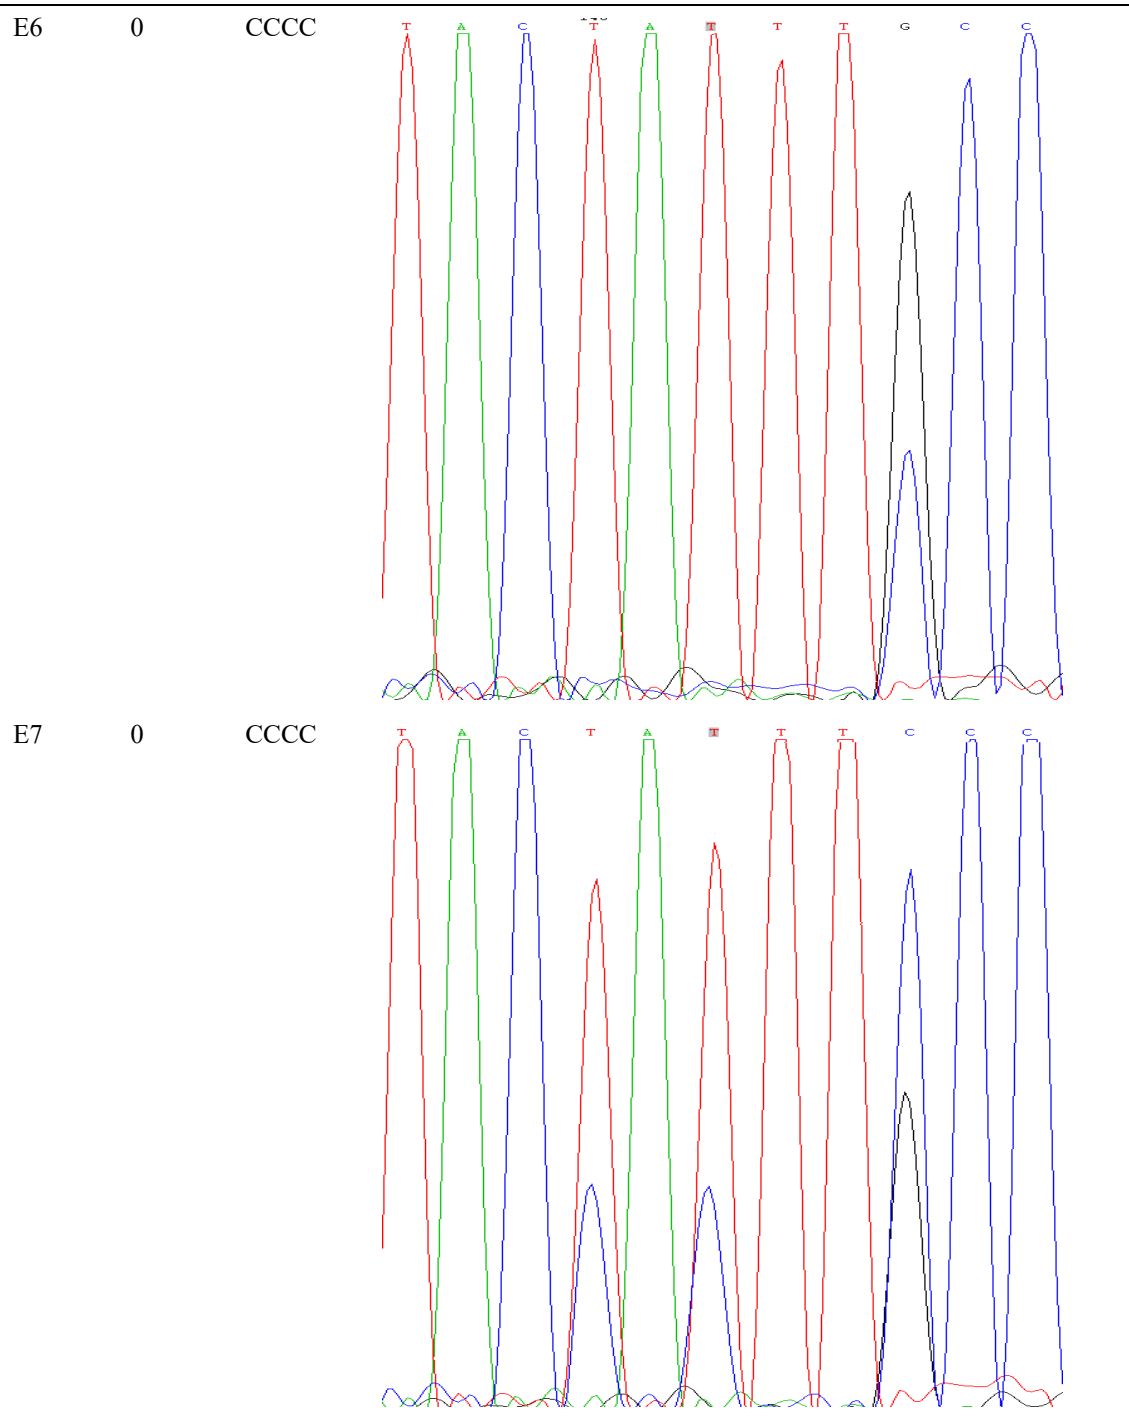

---

|    |   |      |
|----|---|------|
| E8 | 1 | CCCT |
|----|---|------|

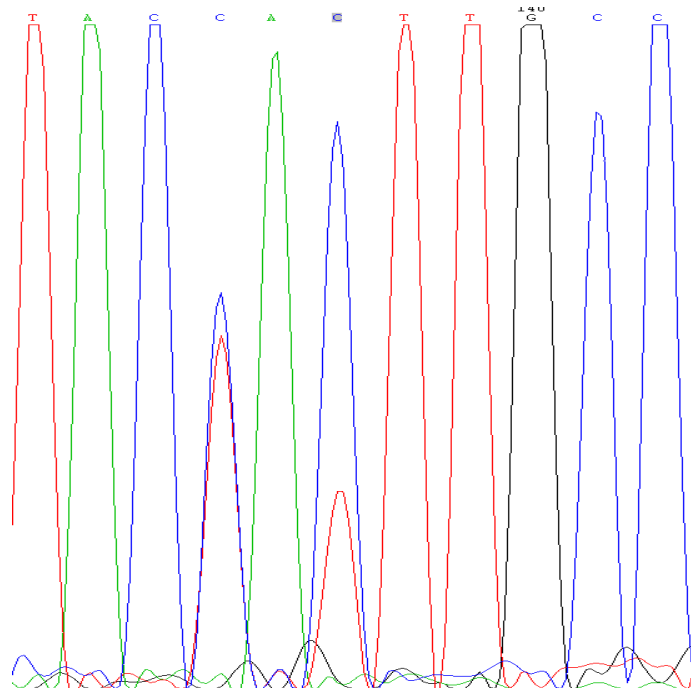

|    |   |      |
|----|---|------|
| E9 | 0 | CCCC |
|----|---|------|

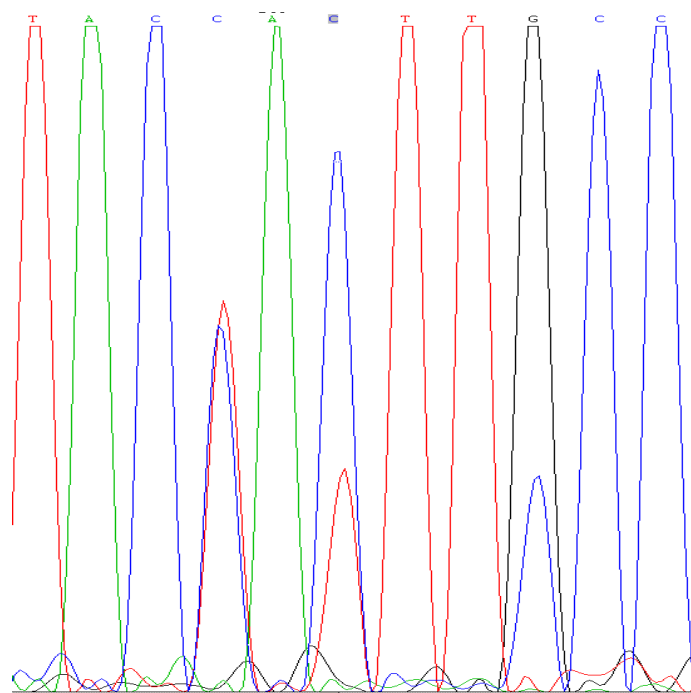

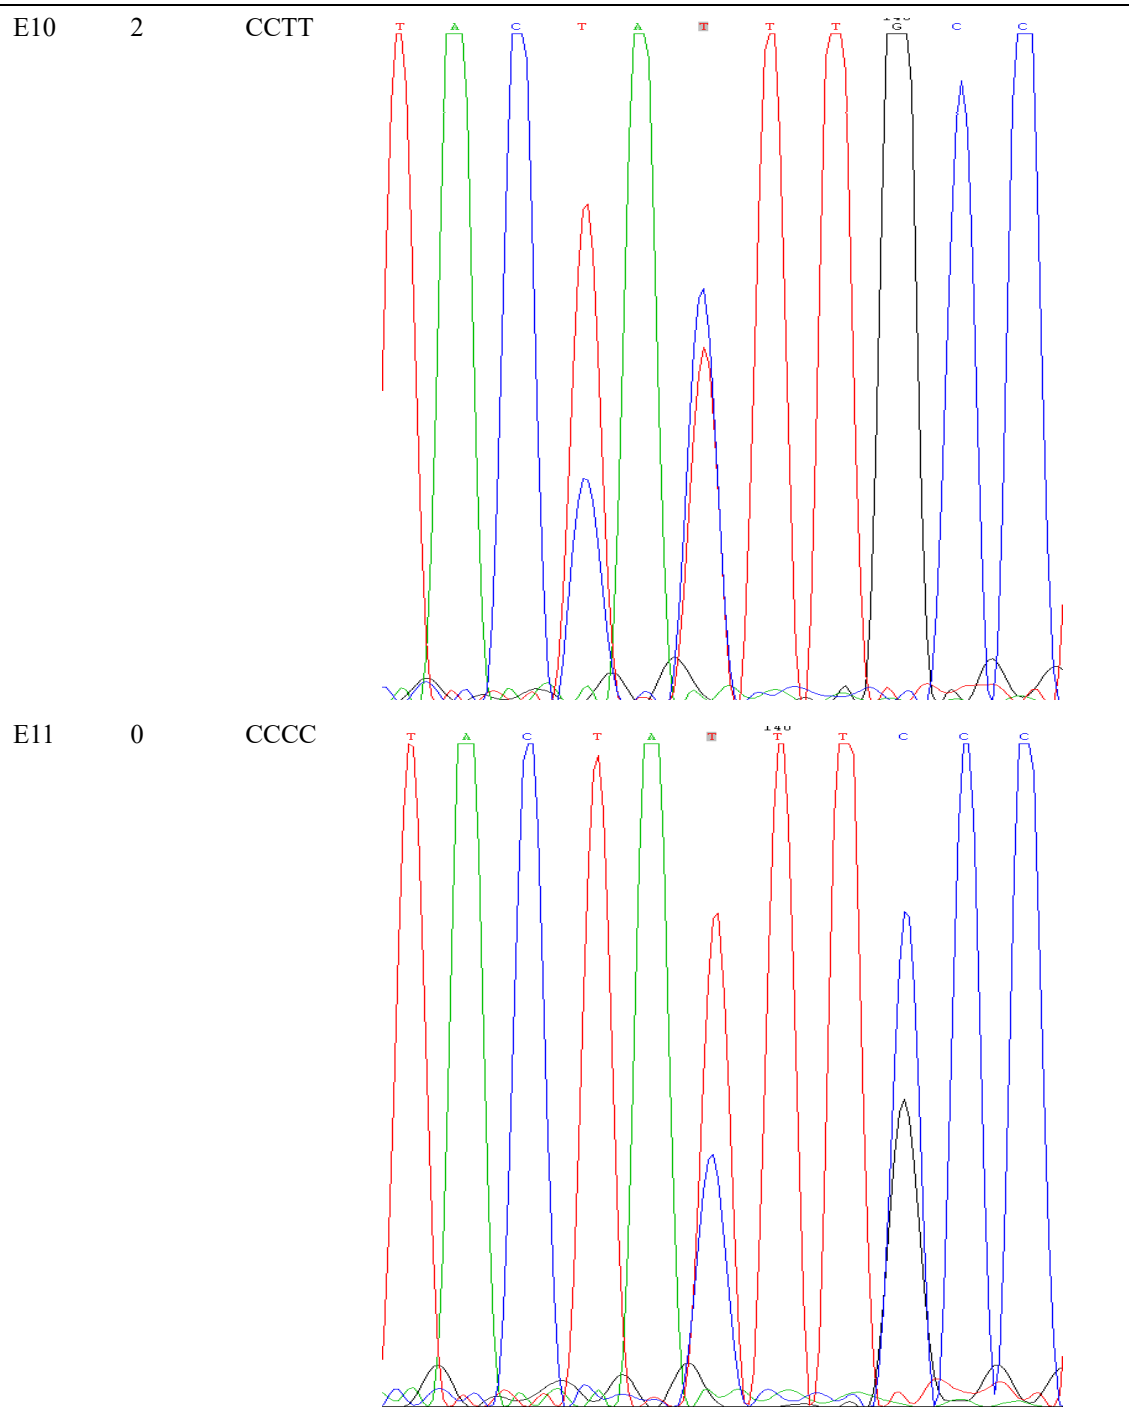

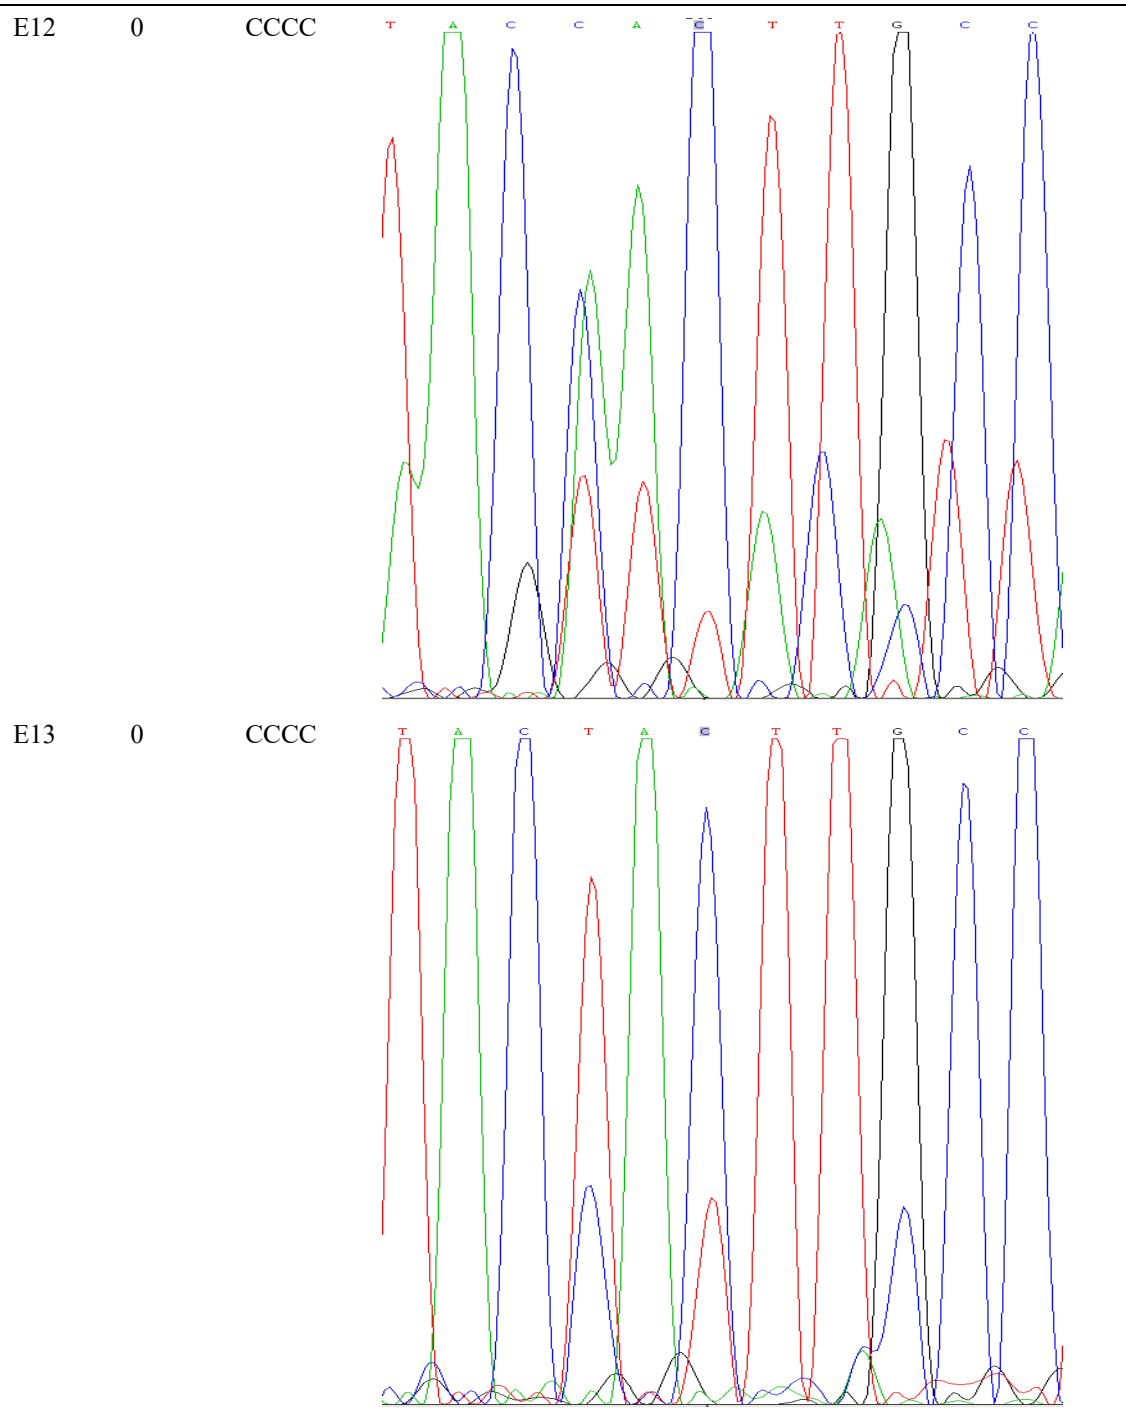



---

E14      2      CCTT

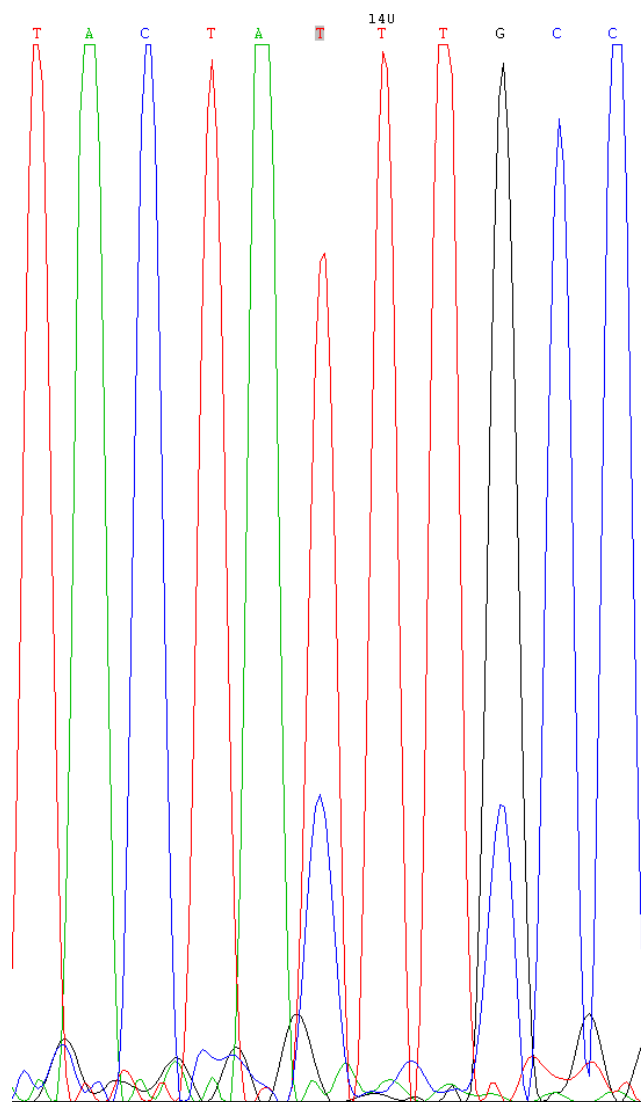

E15      3      CTTT

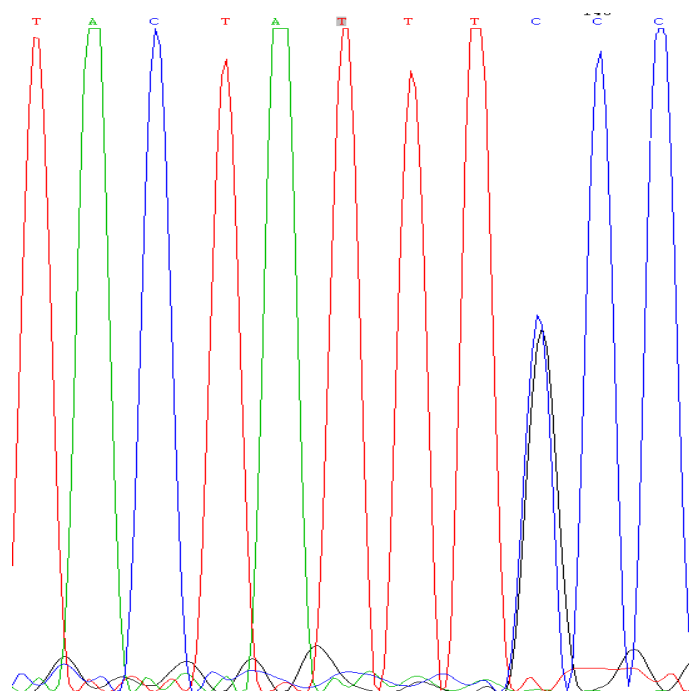

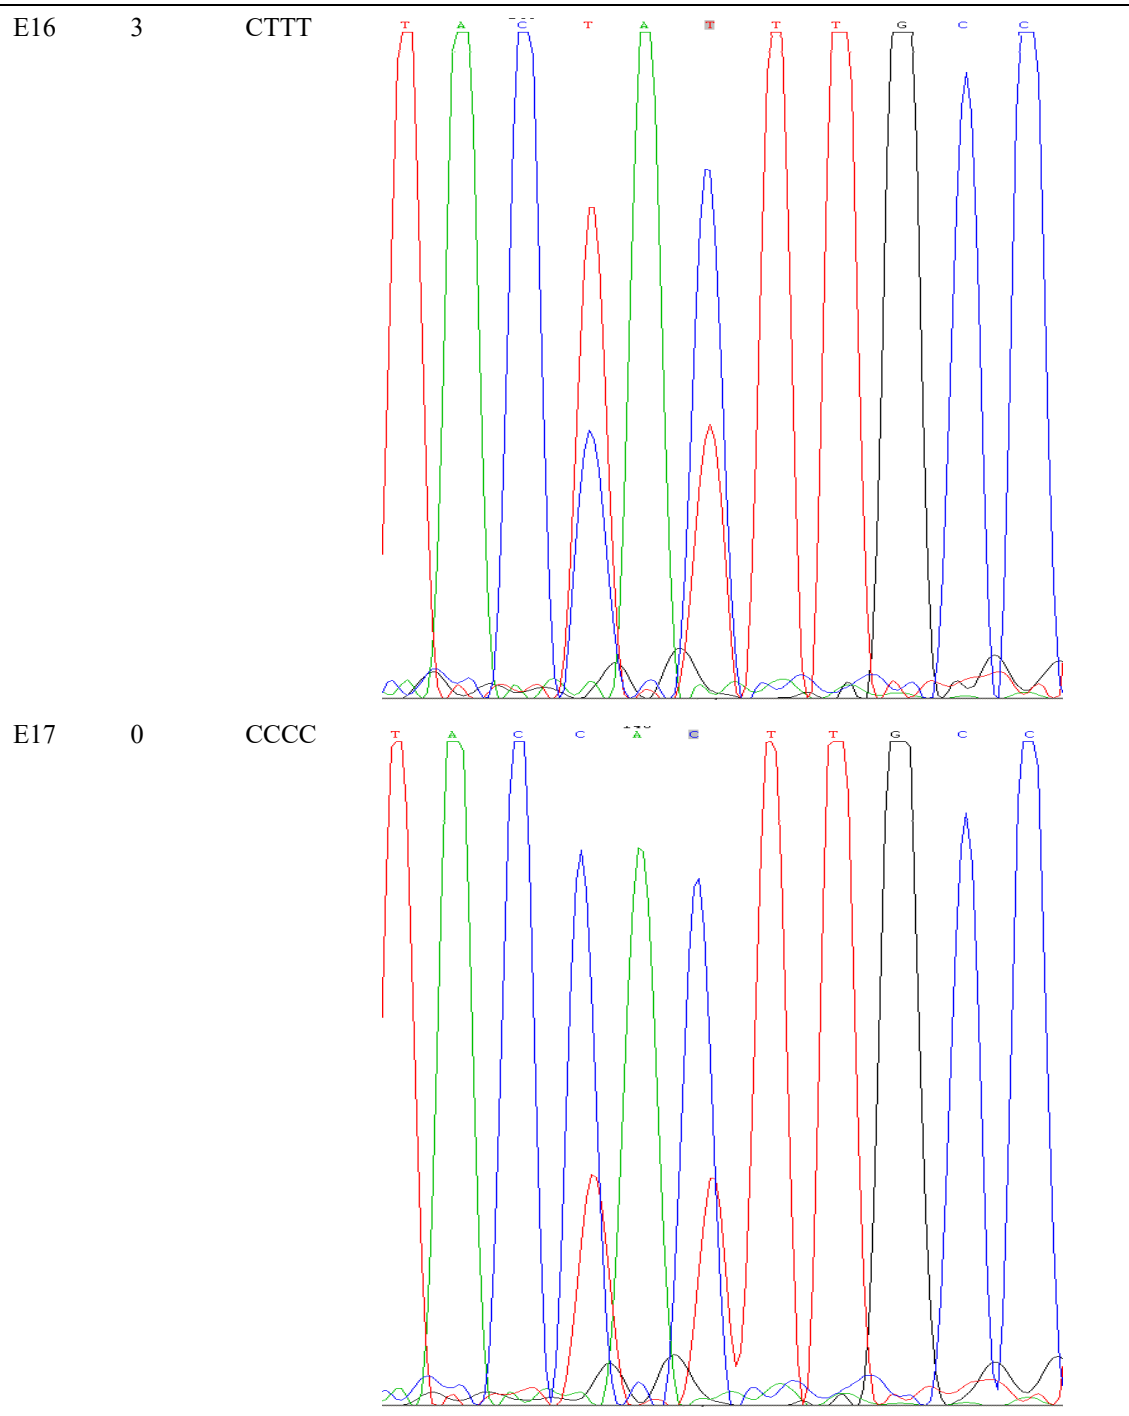

---

E18      1      CCCT

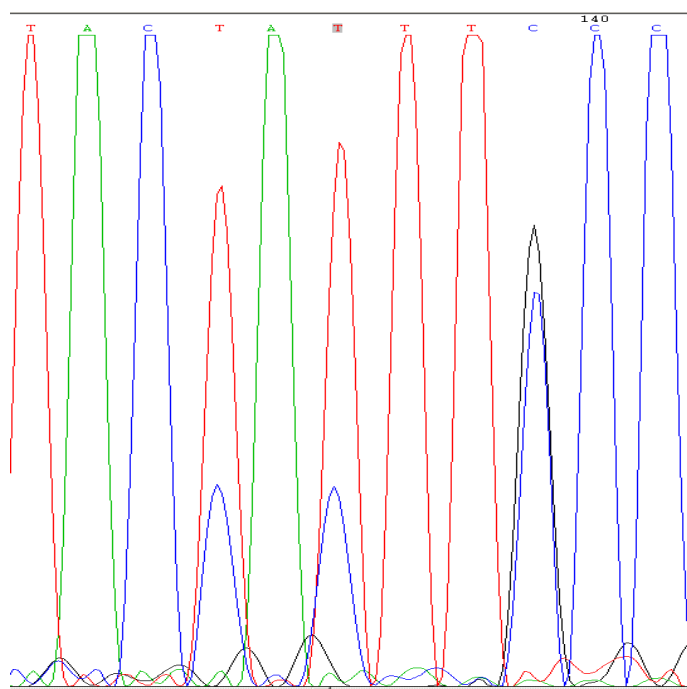

E19      1      CCCT

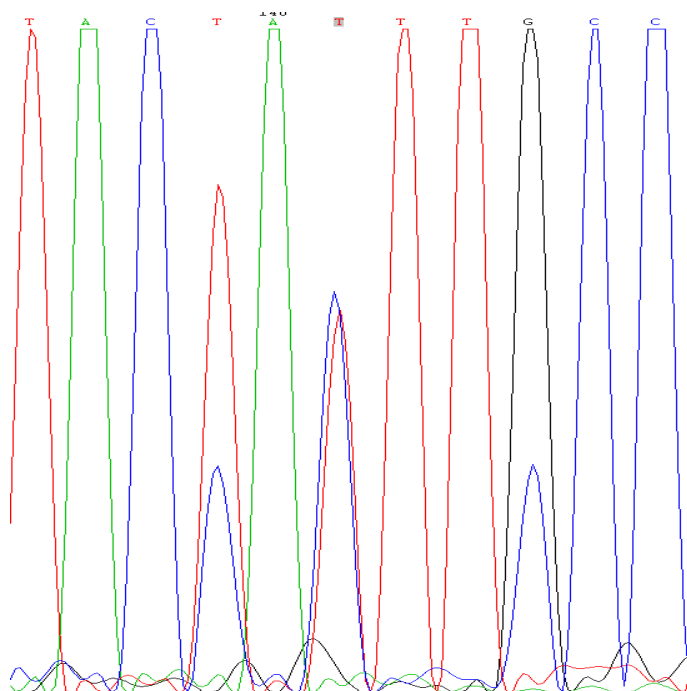

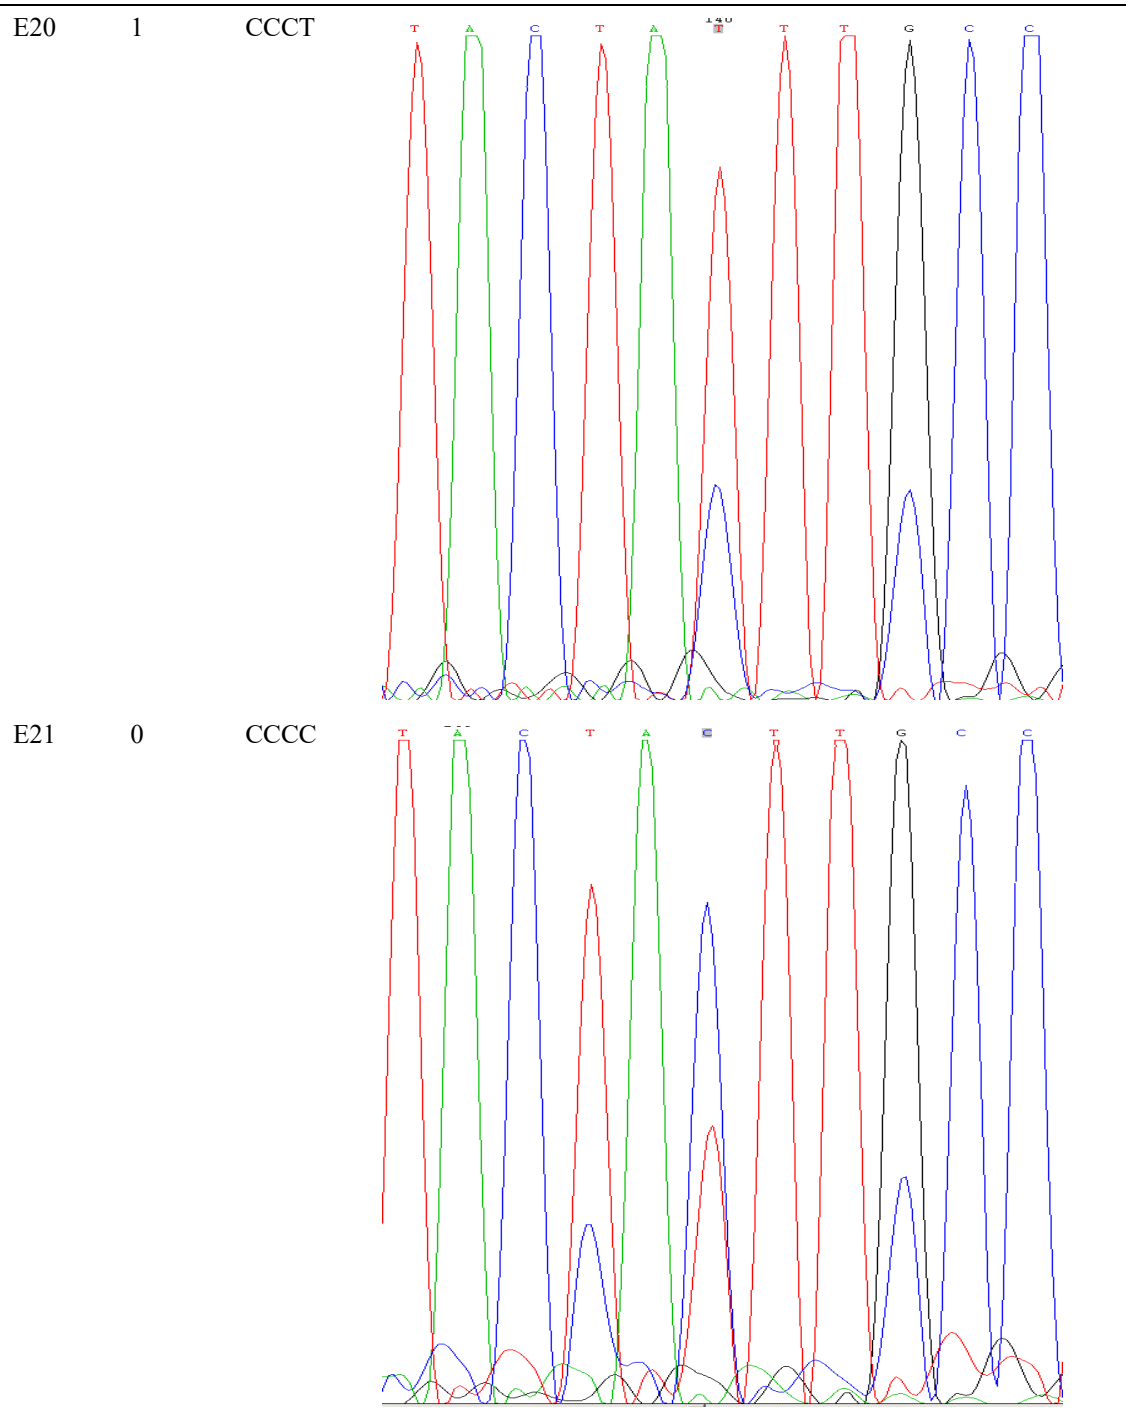

---

|     |   |      |
|-----|---|------|
| E22 | 1 | CCCT |
|-----|---|------|

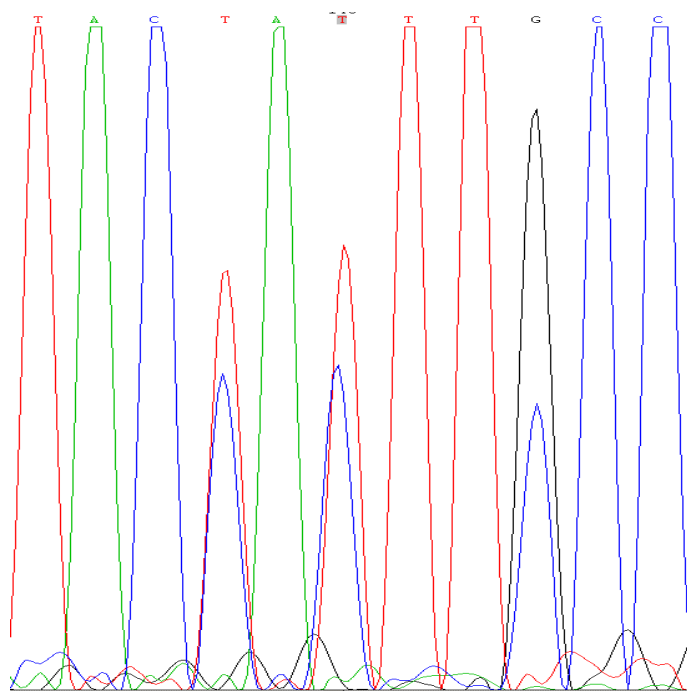

|     |   |      |
|-----|---|------|
| E23 | 1 | CCCT |
|-----|---|------|

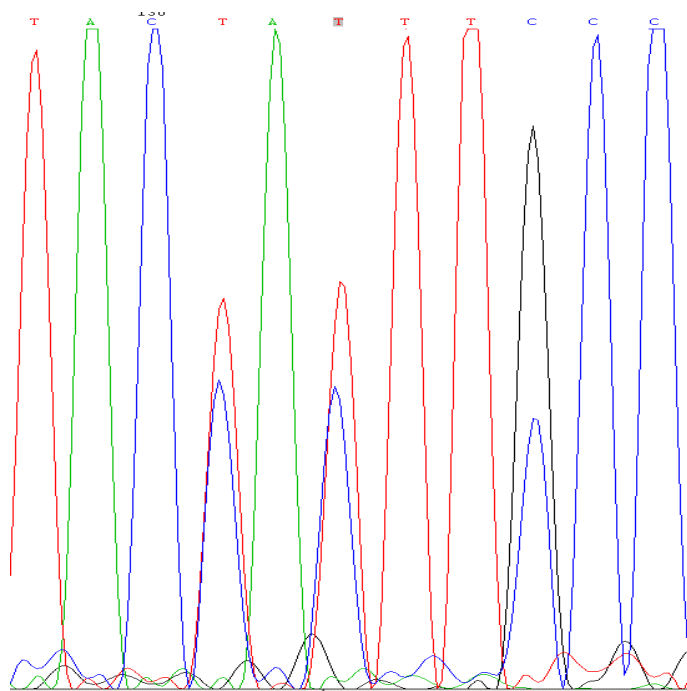

---

E24

1

CCCT

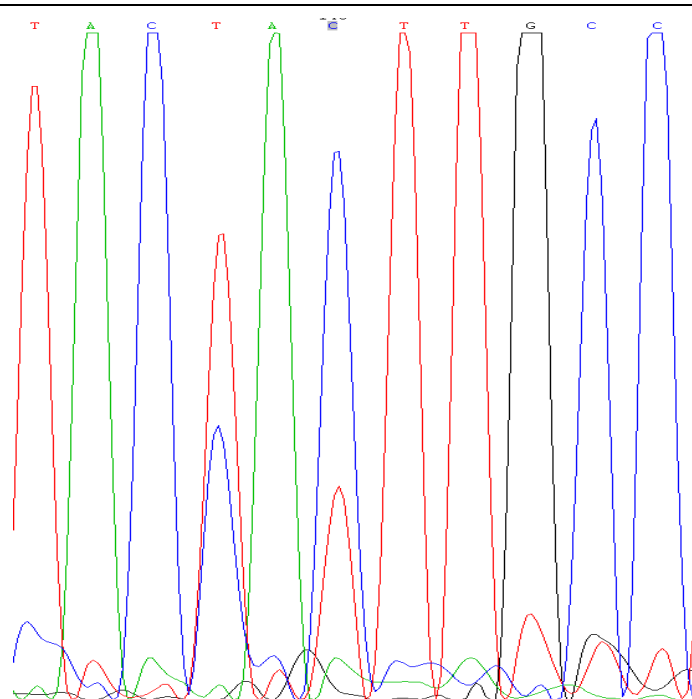

Supplement: s1 [file s1]
